# Supplementary material for: PARP Inhibition Modulates Mitochondrial Morphology and Metabolism Under Hypoxic Stress in Cancer Cells
Source: Research Square preprint supplement (doi:10.21203/rs.3.rs-7363618/v1), 2025-09-12
Supplement: Supplementary file 1 [file 727aaf2ff2283c9bc0303691.pdf]

## Supplementary Information Material and Methods:

### Immunofluorescence

Immunostaining for HIF-1 $\alpha$  was performed on cells grown on glass cover-slips (density of  $5,5 \times 10^4$  cells per well and in 6-well plates) and fixed with 3% paraformaldehyde, 2% sucrose, PBS1x solution for 10 min RT. Fixed cells were permeabilized with 0.5% Triton-X100, PBS1x solution for 5 min RT and blocked with 2% BSA PBS1x for 1 h at 37 °C. HIF-1 $\alpha$  was detected using polyclonal antibody (NB100-479, Novus Biological) 1:400 and FITC-conjugated goat anti-mouse immunoglobulin (Sigma-Aldrich, USA) 1: 800 in 2% BSA PBS1x solution. Nuclear counterstaining with DAPI (1:5000 in PBS1x) was performed after removal of excess secondary antibody. Cells were mounted on microscope slides with Vectashield mounting medium for fluorescence (Vector Company, USA). Immunostaining was visualized with a SP8 High-Resolution STED (Stimulated Emission Depletion) Zeiss Fluorescence Microscope (Zeiss, Germany).

### Superoxide Production

Mitochondrial Superoxide Indicator (Red) Assay Kit (Abcam, UK) was utilized as a sensitive detection reagent for mitochondrial superoxide in adherent cells. In all the assayed conditions, cells were plated in 96-well plates with a density of  $8 \times 10^3$  cells per well. Fresh medium and cells without probe were used as controls. After treatments, all the conditions were washed with PBS1x / 0.2% BSA and maintained in Hank's balanced Salt Solution (Thermo Fisher Scientific, USA). According to manufacturer instructions, the absorbance was measured using a micro-plate reader TECAN NanoQuant Infinite M200 (Tecan, Swiss) with a specific Ex/Em 540/580 nm. H<sub>2</sub>O<sub>2</sub> 10 mM for 10 min was used as a positive control of mitochondrial superoxide production.

### Isolation and Fractionation of Mitochondria

Isolated functional mitochondria and lysed mitochondria extracts will be obtained using the Thermo Fisher Mitochondria Isolation Kit (Thermo Fisher Scientific, USA), according to the manufacturer's instructions. HeLa cells were plated in 100 mm dishes with a density of  $2 \times 10^6$  cells per dish by duplicates.  $\alpha$ -tubulin and TOMM20 were used as cytosolic and mitochondria control marker respectively.

### Statistical analysis

All the experiments were performed at least 3 times, except the TEM assays which were repeated twice. The data are presented as the means  $\pm$  standard errors of the means (SEMs) and calculated with GraphPad Prism 10 software. Differences between conditions were analyzed with ordinary one-way or two-way ANOVA with Bonferroni post hoc correction and considered statistically significant when the *p* value was  $< 0.05$ .

**Supplementary Table S1:** List of Primary and Secondary Antibodies used in this study

| Name                     | Concentration | Reference               | Secondary Ab |
|--------------------------|---------------|-------------------------|--------------|
| anti-HIF-1 $\alpha$      | 1:4000        | NB100-479, Novus        | Rabbit       |
| anti-PARP-1 (C2-10)      | 1:1000        | MA3-950, Thermo         | Mouse        |
| anti-PAR 10HA            | 1:2000        | 4335-MC-100, Biotech    | Mouse        |
| anti-SOD2 (A-2)          | 1:3000        | sc-133134, SantaCruz    | Mouse        |
| anti- FIS1 (E3K9O)       | 1:1000        | 32525, Cell Signaling   | Rabbit       |
| anti-p-DRP1(S616) (D9A1) | 1:1000        | 4494S, Cell Signaling   | Rabbit       |
| anti-PARKIN              | 1:2000        | 2132S, Cell Signaling   | Rabbit       |
| anti p-PINK1 (Ser628)    | 1:1000        | PA5-105356, Invitrogen  | Rabbit       |
| anti-PINK1 (D8G3)        | 1:1000        | 6946S, Cell Signaling   | Rabbit       |
| anti-TOMM20              | 1:2000        | 11802-1-AP, Proteintech | Rabbit       |
| anti-HK2 (EPR20839)      | 1:1000        | ab209847, AbCam         | Mouse        |

|                                  |         |                       |        |
|----------------------------------|---------|-----------------------|--------|
| anti-CA9 (EPR23055)              | 1:1000  | ab243660, AbCam       | Rabbit |
| anti-LC3I/II                     | 1:750   | PD014, MBL            | Rabbit |
| anti-ULK1 (H-240)                | 1:1000  | sc-33182, Santa Cruz  | Rabbit |
| anti-pULK1(S467)                 | 1:1000  | sc-8418, Santa Cruz   | Rabbit |
| anti-p-AMPK(Thr172)<br>(40H9)    | 1:1000  | 2535, Cell Signaling  | Rabbit |
| anti- AMPK $\alpha$ (D5A2)       | 1:2500  | 5831, Cell Signaling  | Rabbit |
| anti-p-p70 <sup>S6k</sup> (T389) | 1:1000  | 9205S, Cell Signaling | Rabbit |
| anti-p70S6 <sup>k</sup> (H-9)    | 1:1000  | sc-8418, Santa Cruz   | Mouse  |
| anti-GAPDH (14C10)               | 1:5000  | 2118, Cell Signaling  | Rabbit |
| anti- $\beta$ actin (AbGEa)      | 1:10000 | MA1-744, Thermo       | Mouse  |
| anti- $\alpha$ tubulin           | 1:10000 | 236-10501, Thermo     | Mouse  |

**Supplementary Table S2:** human siRNA sequences for human cancer cells

|                                 |                                  |
|---------------------------------|----------------------------------|
| <b>Scrambler SCR (h)</b>        |                                  |
| Fw 5'-CUUUGGGUGAUCUACGUUA-3'    | Rv 5'-UACGUAGAUACCCCAAAG-3'      |
| <b>siPARP1 (h)</b>              |                                  |
| Fw 5'-GAAGAUGGUGGACCCGGAG-3'    | Rv 5'-CUCCGGGUCCACCAUCUUC-3'     |
| <b>siATG5 (h)</b>               |                                  |
| Fw: 5'-CCCUCUAUCAGGAUGAGAUTT-3' | Rv: 5'-AUCUCAUCCUGA UAGAGGGTT-3' |
| <b>siATG7 (h)</b>               |                                  |
| Fw: 5'-ACUAAAAGGGGCAAACUGCAG-3' | Rv: 5'-GCAGUUUGCCCCUUUUAGUAG-3'  |

**Supplementary Table S3:** List of RT-qPCR primers used in the study (Forward/Reverse 5'-3')

|                                |                                    |                                 |
|--------------------------------|------------------------------------|---------------------------------|
| <i>Bnip3</i>                   | 5'- GTCTGGACGGAGTAGC -3'           | 5'- GGCCGACTTGACCAAT -3'        |
| <i>Beclin1</i>                 | 5'- ACCGTGTCACCATCCAGGA -3'        | 5'- GAAGCTGTTGGC ACTTTCTGT -3'  |
| <i>Fis1</i>                    | 5'- GTCCAAGAGCACGCAGTTTG -3'       | 5'- ATGCCTTTACGGATGTCATCATT -3' |
| <i>Mff</i>                     | 5'- ACTGAAGGCATTAGTCAGCGA -3'      | 5'- TCCTGCTACAACAATCCTCTCC -3'  |
| <i>Opa1</i>                    | 5'- TGCCTGACATTGTGTGGGAAA -3'      | 5'- TTCCGGAGAACCTGAGGTAA -3'    |
| <i>Mfn1</i>                    | 5'- AGTTGGAGCGGAGACTTAGC -3'       | 5'- ATCGCCTTCTTAGCCAGCAC - 3'   |
| <i>Mfn2</i>                    | 5'- AATCTGAGGCGACTGGTGAC -3'       | 5'- GGACATTGCGCTTCACCTTC -3'    |
| <i>Hk2</i>                     | 5'- TCACGGAGCTCAACCATGAC -3'       | 5'- CCCAAAGCACACGGAAGTTG -3'    |
| <i>Pdk1</i>                    | 5'- CTGTGATACGGATCAGAAACCG -3'     | 5'- TCCACCAAACAATAAAGAGTGCT -3' |
| <i>Pfkfb3</i>                  | 5'- ATCTACCTGAACGTGGAGTCCGTCTG -3' | 5'- TCAGTGTTCCTGGAGGAGTCAGC-3'  |
| <i>Pfkfb4</i>                  | 5'- TTAATTTTGGAGAACAGAATGGC -3'    | 5'- CGTAGCCTCATCACTGTCGC -3'    |
| <i><math>\beta</math>actin</i> | 5'- CGACAGGATGCAGAAGGAGAT -3'      | 5'- CAAGAAAGGGTGTAACGCAACTA -3' |
| <i>36B4</i>                    | 5'- CAGATTGGCTACCCAACCTGTT -3'     | 5'- GGCCAGGACTCGTTTGTACC - 3'   |
